# Supplementary material for: Complement Lysis Activity in Autologous Plasma Is Associated with Lower Viral Loads during the Acute Phase of HIV-1 Infection
Source: PLOS journal article supplement (doi:10.1371/journal.pmed.0030441), 2006-11-16
Supplement: S1 (10.1371/journal.pmed.0030441.s001) [file journal.pmed.0030441.s001]

Table S1: Control group demographics

| **code** | **gender (m/f)** | **age (years)** |
| --- | --- | --- |
| co 1 | f | 28 |
| co 2 | f | 40 |
| co 3 | m | 50 |
| co 4 | m | 28 |
| co 5 | f | 29 |
| co 6 | m | 34 |
| co 7 | f | 40 |
| co 8 | m | 43 |
| co 9 | m | 28 |
| co 10 | m | 43 |
| co 11 | m | 39 |
| **11** | **7/4** | **Median 39** |
|  |  | **IQR 28 - 43** |
